# Supplementary material
Source: Springer Nature journal article supplement (https://www.springermedizin.de/resource/supplementary/12946_2011_144_MOESM10_ESM.pdf/9555258)

A.

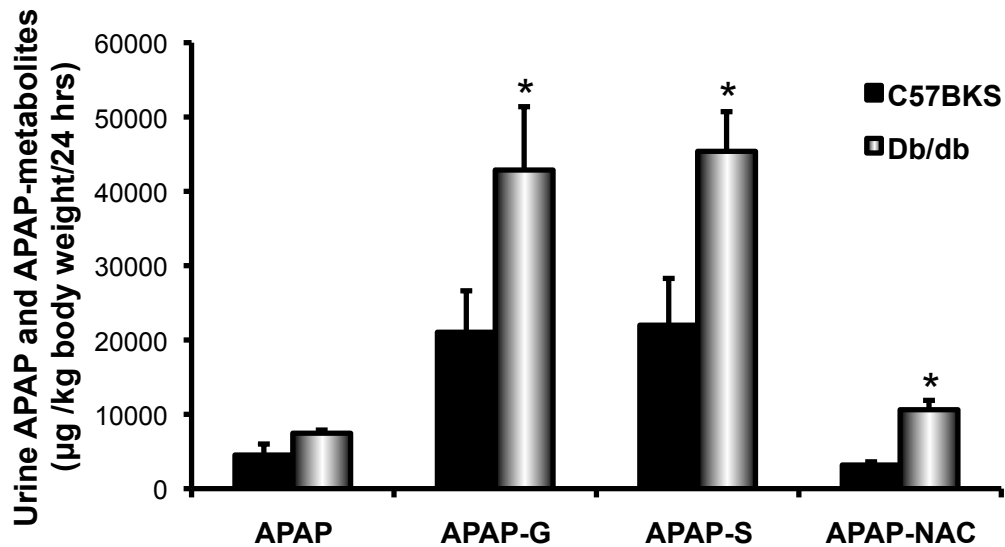

B.

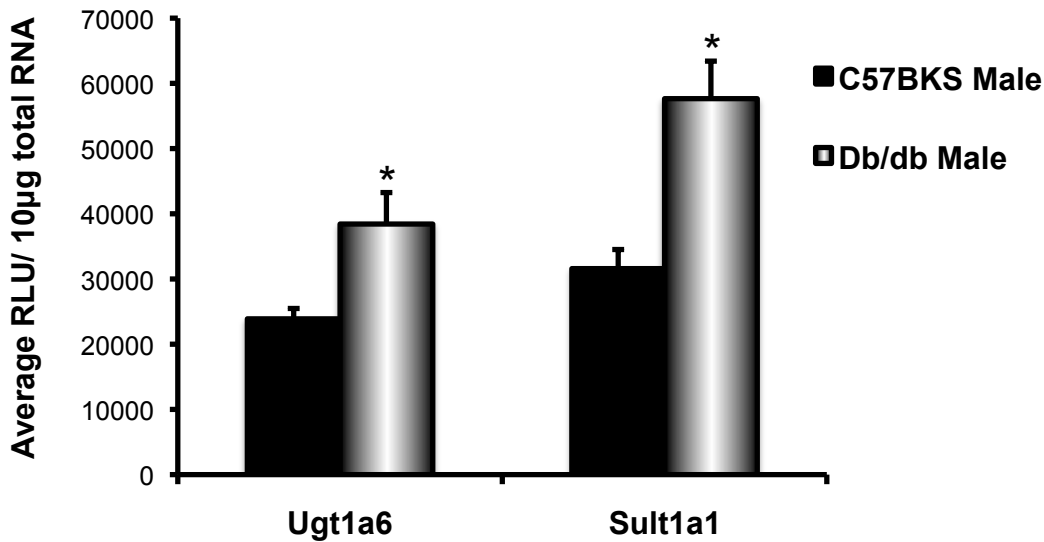

Supplement: MOESM10 [file 9555258]
